# Supplementary material for: Neuronal induction of BNIP3-mediated mitophagy slows systemic aging in Drosophila
Source: Research Square preprint supplement (doi:10.21203/rs.3.rs-438556/v1), 2021-04-27
Supplement: Supplementary file 2 [file 6959f9a7546c3037de492576.pdf]

Extended Data Figure 1. related to Figure 1.

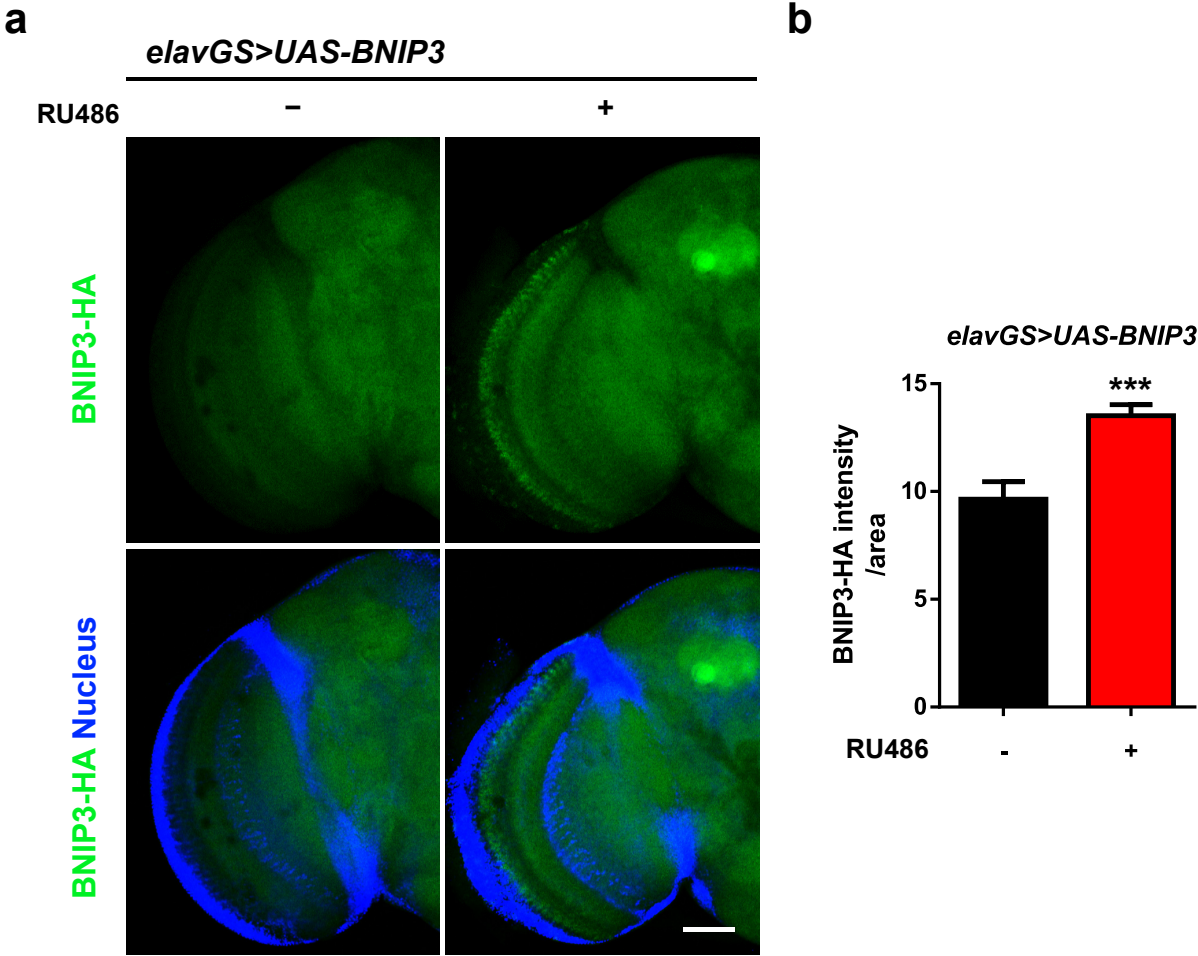

# Extended Data Figure 2. related to Figure 1.

**a**

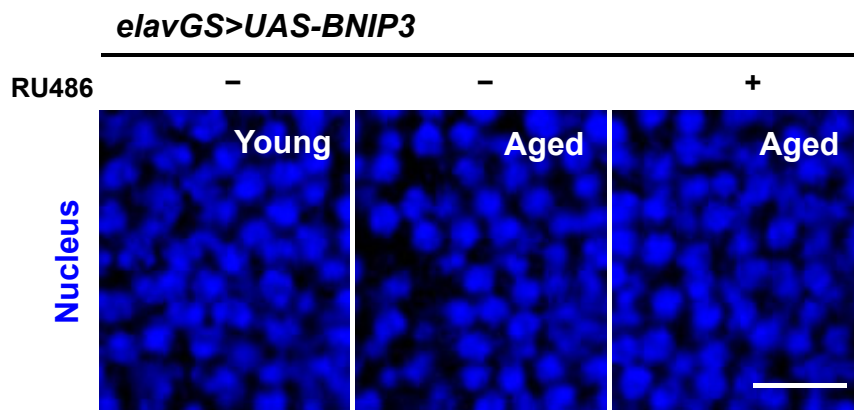

**b**

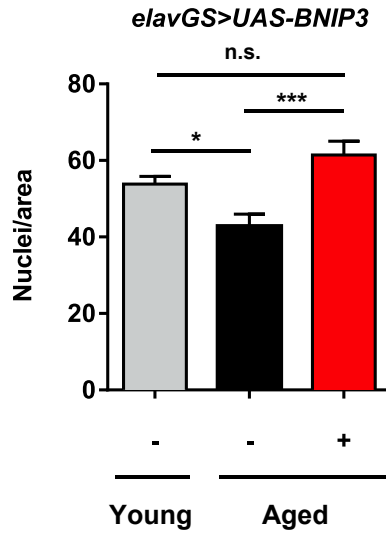

# Extended Data Figure 3. related to Figure 1.

**a**

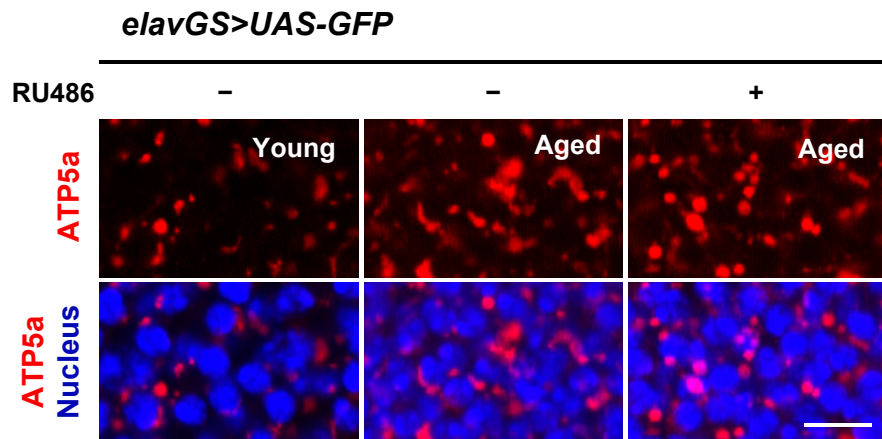

**b**

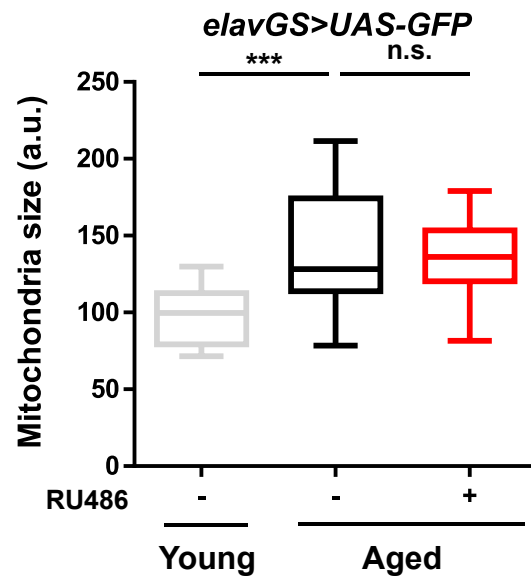

# Extended Data Figure 4. related to Figure 2.

**a**

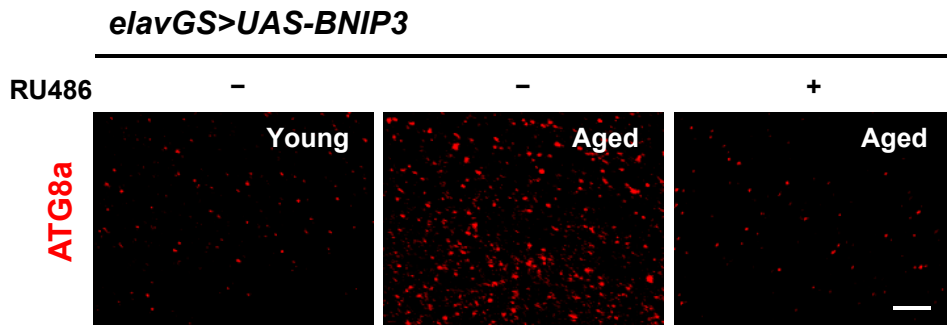

**b**

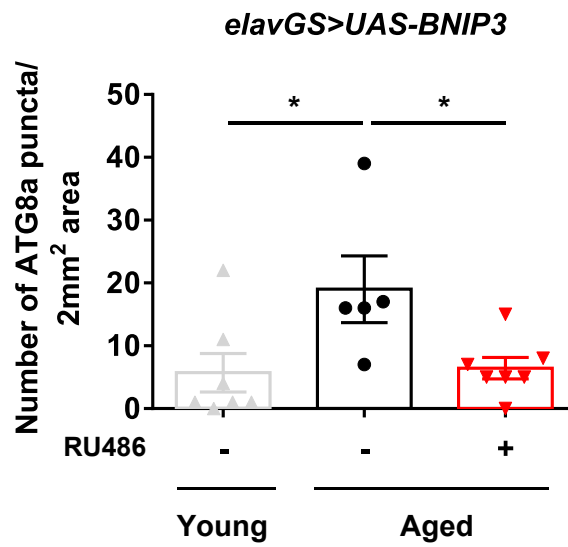

# Extended Data Figure 5. related to Figure 2 and 3.

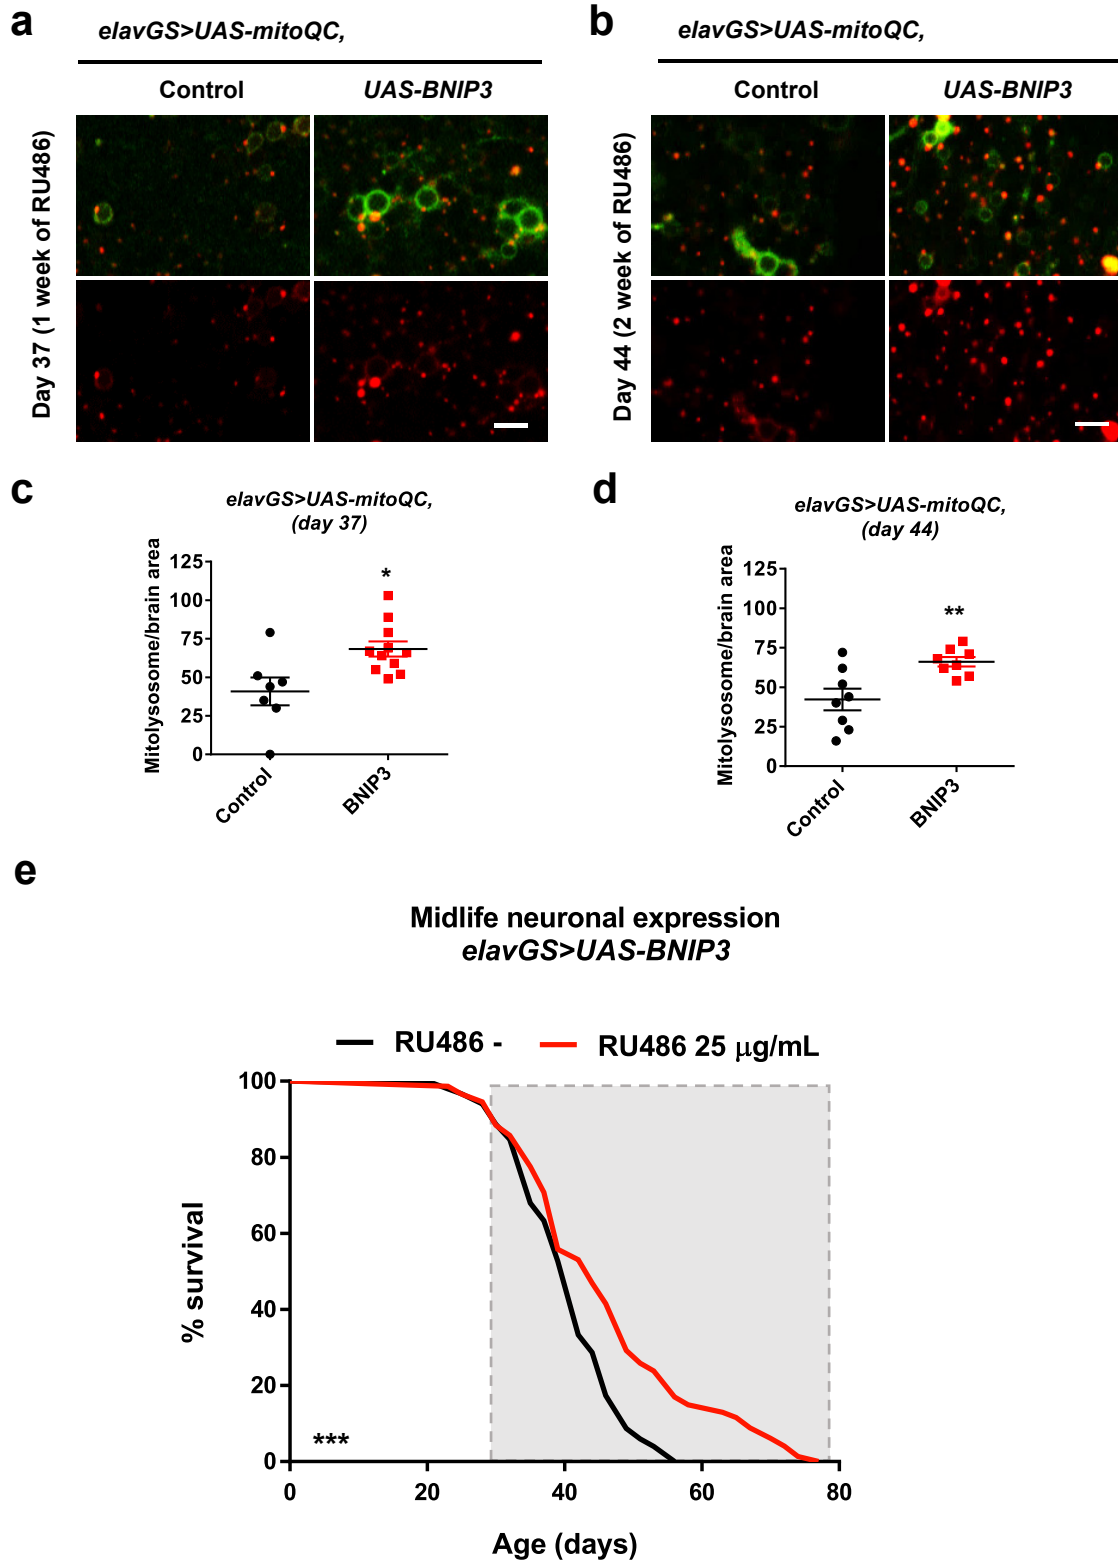

Extended Data Figure 6. related to Figure 2.

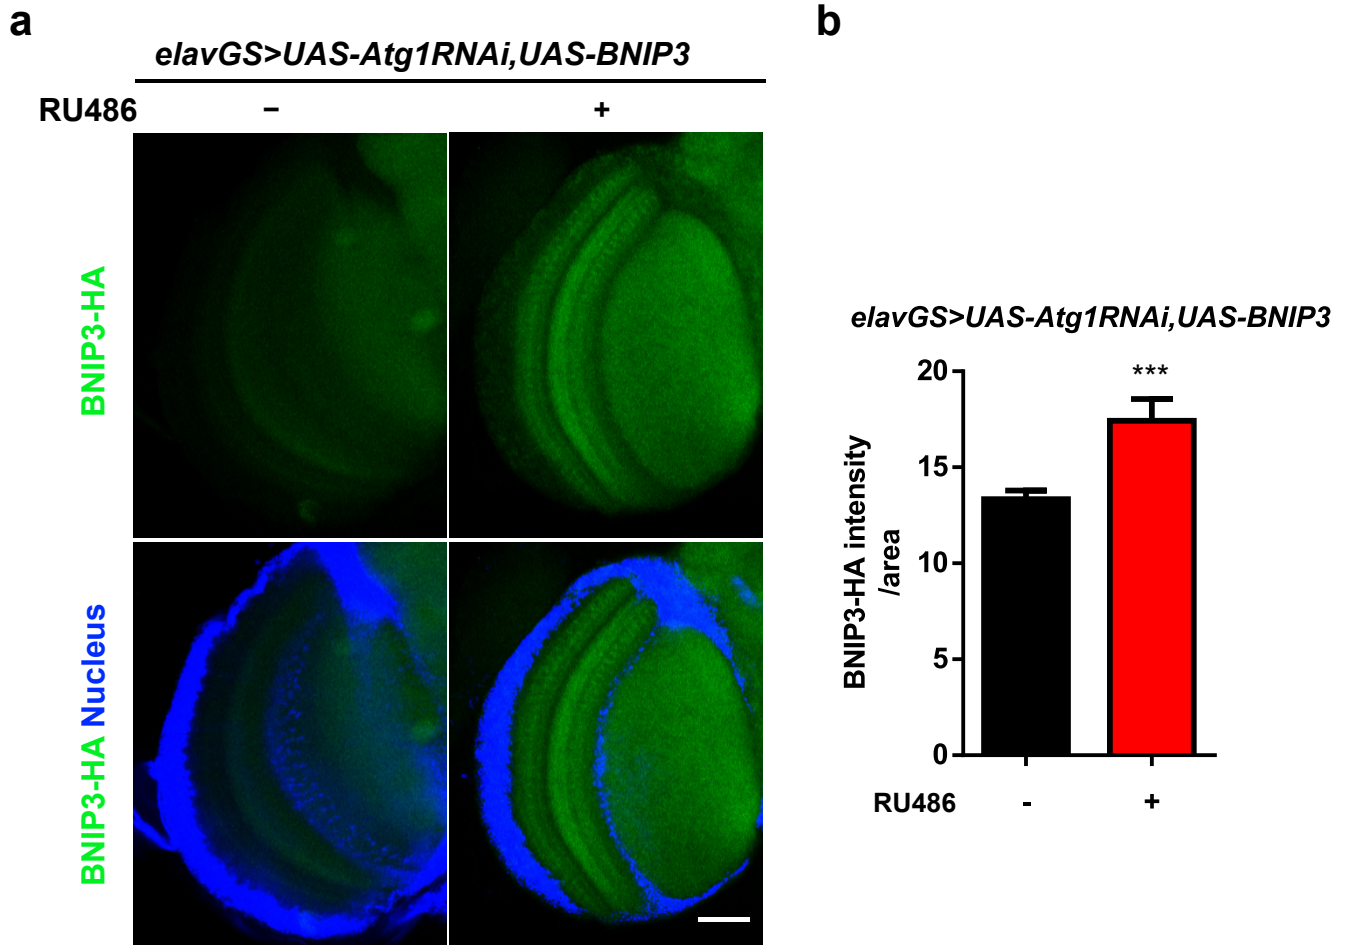

# Extended Data Figure 7. related to Figure 3.

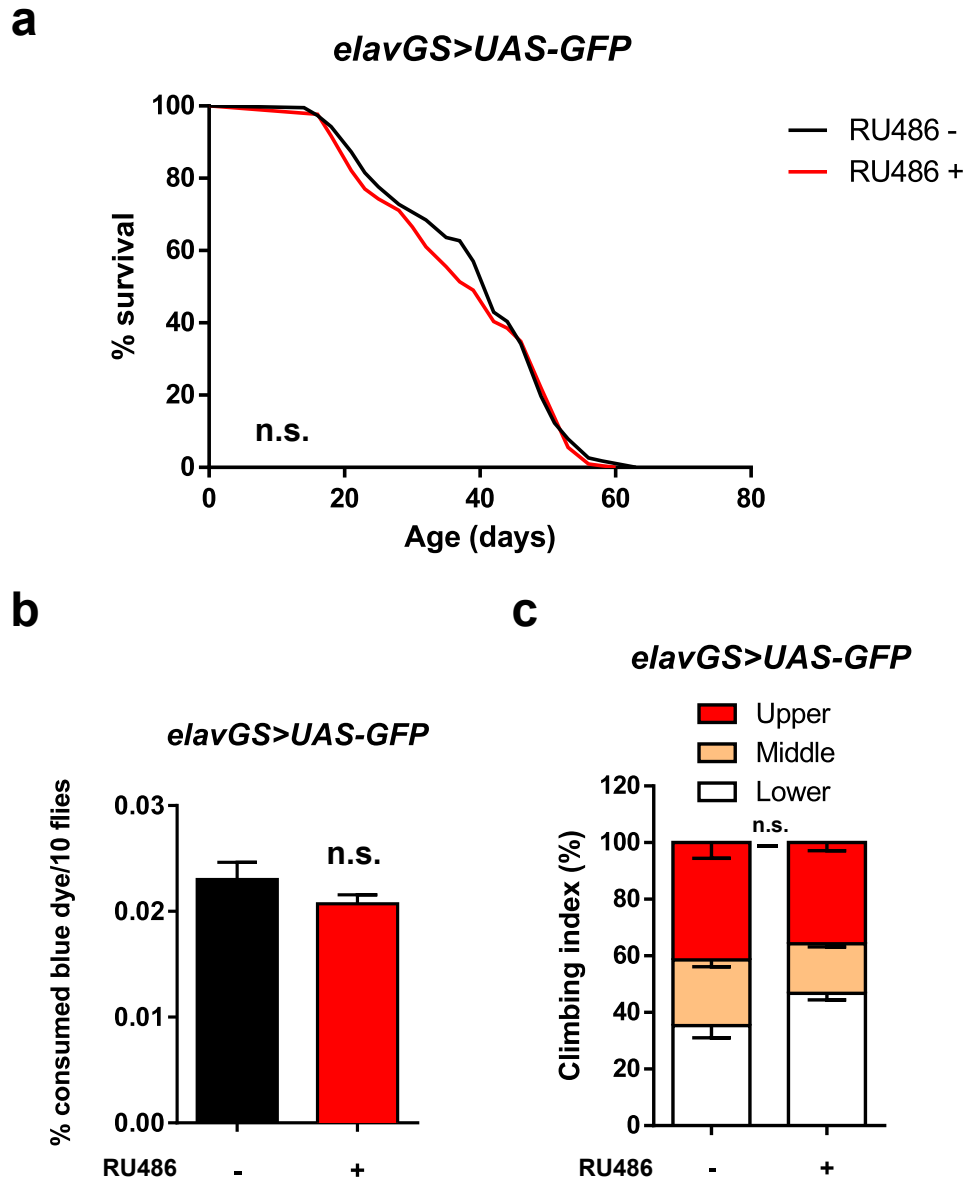

Extended Data Figure 8. related to Figure 3.

**a**

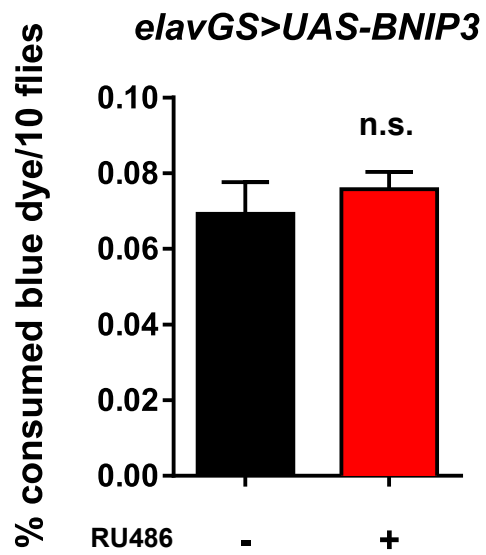

**b**

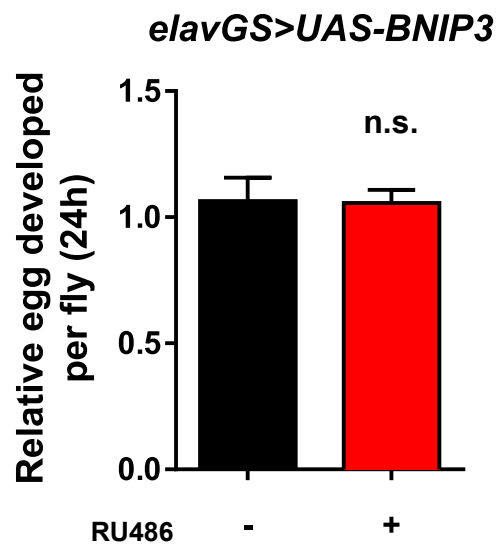

# Extended Data Figure 9. related to Figure 3.

**a**

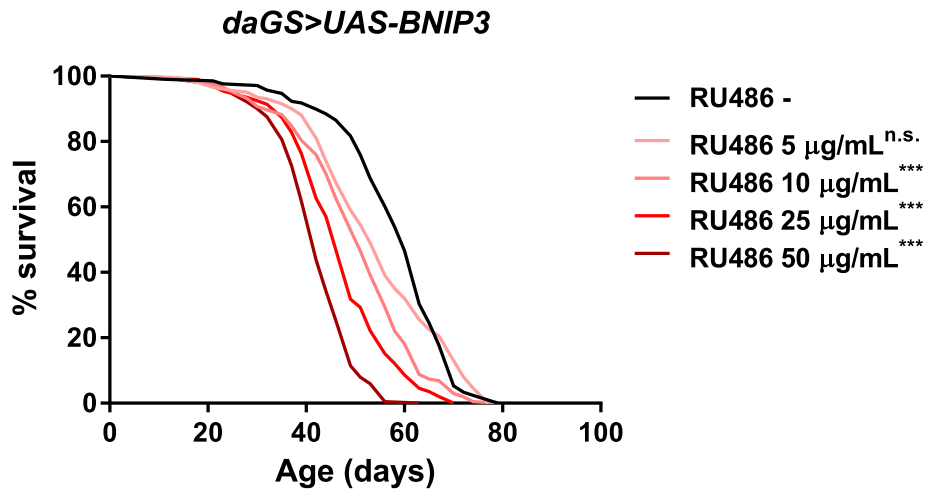

**b**

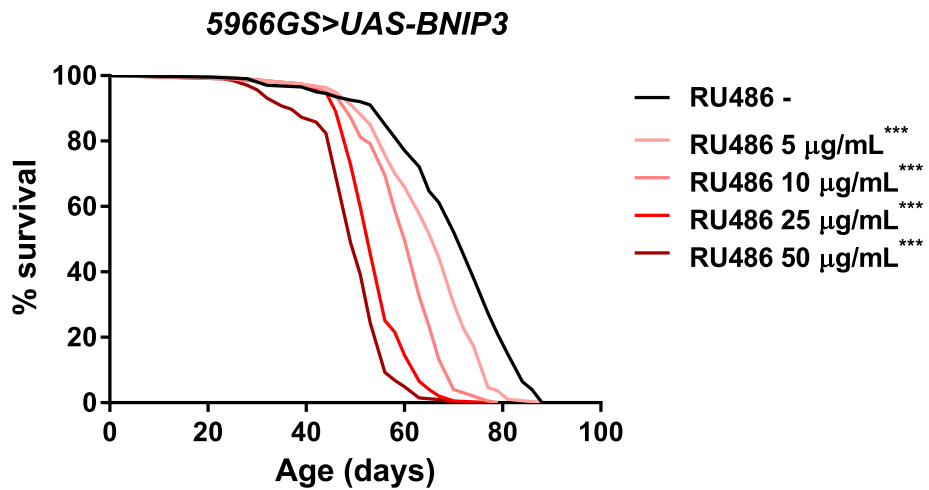

**c**

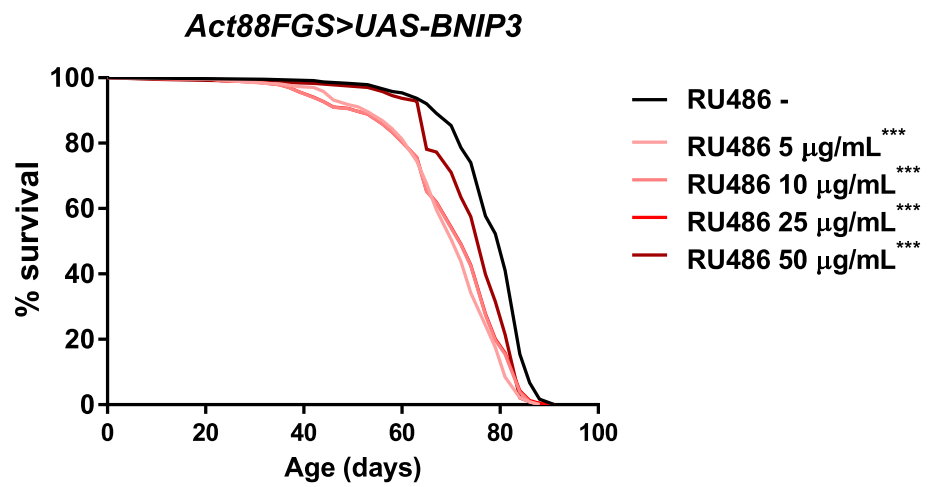

# Extended Data Figure 10. related to Figure 4.

**a**

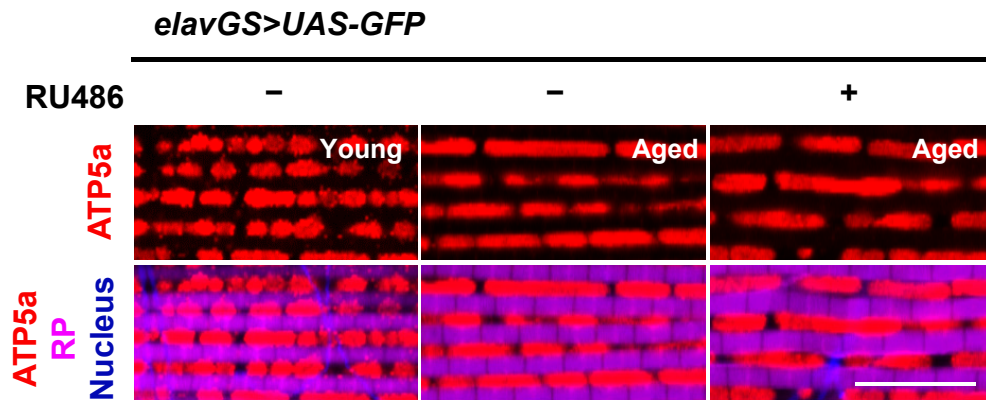

**b**

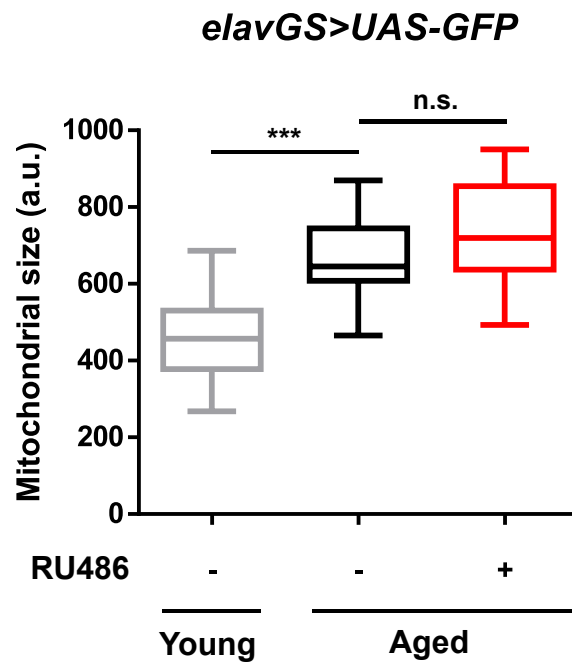

# Extended Data Figure 11. related to Figure 5.

**a**

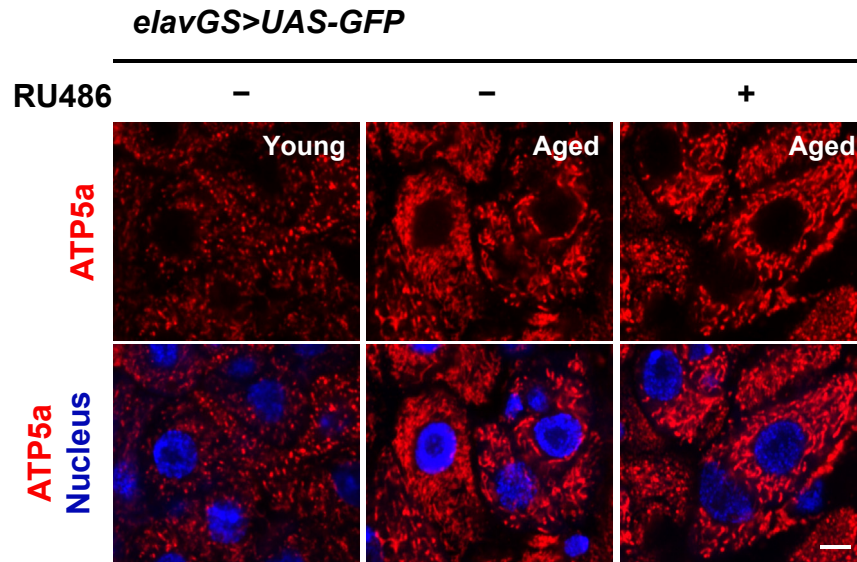

**b**

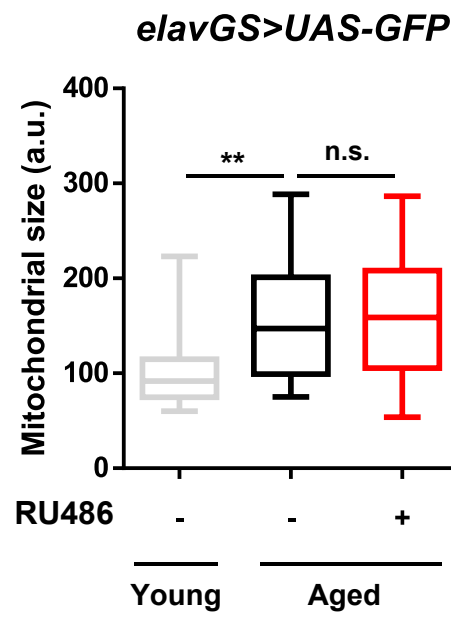

Extended Data Figure 12. related to Figure 5.

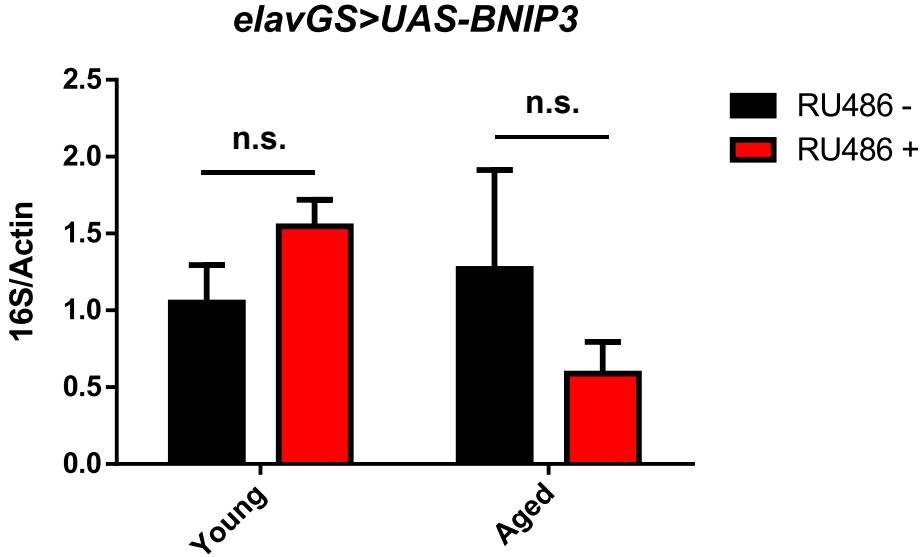

## Extended Data Table 1. related to Figure 3.

*elavGS>UAS-BNIP3*

|       | Median survival |     |                   | Maximum Survival |     |                    | p value | N       |
|-------|-----------------|-----|-------------------|------------------|-----|--------------------|---------|---------|
|       | RU-             | RU+ | % median survival | RU-              | RU+ | % maximum survival |         |         |
| Exp 1 | 45              | 49  | +8.9              | 70               | 79  | +12.9              | ***     | 146-147 |
| Exp 2 | 40              | 45  | +12.5             | 53               | 59  | +11.3              | ***     | 145-149 |
| Exp 3 | 44              | 52  | +18.2             | 55               | 68  | +23.6              | ***     | 125-153 |
| Exp 4 | 32              | 35  | +9.4              | 53               | 58  | +9.4               | ***     | 270-291 |
| Exp 5 | 35              | 37  | +5.7              | 58               | 63  | +8.6               | ***     | 223-229 |
| Exp 6 | 35              | 39  | +11.4             | 77               | 77  | -                  | *       | 255-257 |
| Exp 7 | 45              | 60  | +33.3             | 77               | 86  | +11.7              | ***     | 196-198 |
